# Supplementary material
Source: publisher figshare collection journal article supplement (https://gsajournals.figshare.com/ndownloader/files/31976156)

| BM1 | **ASI**  [d] | **EV**  [ ] | **Final PH** [cm] | **GDM**  [%] | **GYield**  [t DM/ha] | **P conc** [mg/kg DM] |
| --- | --- | --- | --- | --- | --- | --- |
| Seed |
| 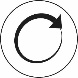ED | -0.17 | 0.51 | 0.13 | 0.23 | 0.00 | 0.22 |
| 0.20 | 0.26 | -0.19 | 0.42 | 0.43 | 0.70 |
| 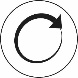EF | -0.11 | 0.27 | 0.05 | -0.02 | -0.11 | 0.24 |
| 0.24 | -0.06 | -0.06 | 0.23 | 0.40 | 0.56 |
| 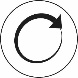LR | 0.03 | 0.59 | 0.31 | 0.18 | 0.42 | 0.18 |
| 0.18 | 0.20 | 0.14 | 0.58 | 0.26 | 0.70 |
| 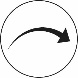  ED EF | -0.07 | 0.24 | -0.13 | 0.11 | 0.11 | 0.26 |
| 0.33 | 0.12 | 0.09 | 0.34 | 0.45 | 0.61 |
| 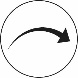  ED LR | 0.07 | 0.41 | -0.05 | 0.04 | 0.05 | -0.05 |
| 0.09 | 0.22 | -0.12 | 0.53 | 0.38 | 0.63 |
| 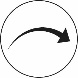  EF ED | -0.04 | 0.43 | -0.15 | 0.08 | 0.08 | 0.18 |
| 0.24 | 0.15 | 0.06 | -0.11 | 0.42 | 0.71 |
| 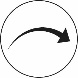  EF LR | -0.04 | 0.38 | 0.23 | -0.03 | -0.12 | 0.05 |
| 0.14 | 0.01 | 0.04 | 0.17 | 0.34 | 0.59 |
| 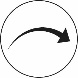  LR ED | 0.11 | 0.43 | -0.08 | 0.07 | 0.19 | -0.04 |
| 0.07 | 0.35 | -0.06 | 0.66 | 0.46 | 0.74 |
| 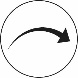  LR EF | -0.10 | 0.33 | 0.21 | -0.05 | -0.07 | 0.06 |
| 0.21 | 0.14 | 0.08 | 0.50 | 0.45 | 0.65 |

Supplement: Supplementary file 1 [file 31976156]
